# Supplementary material
Source: PubMed Central journal article supplement (PMC7286356)
Supplement: NIHMS1584400-supplement-Supplementary_Material.pdf [file NIHMS1584400-supplement-Supplementary_Material.pdf]

# The Tripartite Interaction of Phosphate, Autophagy and $\alpha$ Klotho in Health Maintenance

Mingjun Shi<sup>1</sup>, Jenny Maigne<sup>1</sup>, Peng Li<sup>1#</sup>, Joy Shaffer<sup>1</sup>, Taylor Davidson<sup>4</sup>, Salwa Sebti<sup>2,4</sup>,  
Álvaro F. Fernández<sup>2,4</sup>, Zhongju Zou<sup>2,7</sup>, Shirley Yan<sup>3</sup>, Beth Levine<sup>2,4,5,7</sup>,  
Orson W. Moe<sup>1,4,6,\*</sup>, Ming Chang Hu<sup>1,4\*</sup>

<sup>1</sup>Charles and Jane Pak Center for Mineral Metabolism and Clinical Research

<sup>2</sup>Center for Autophagy Research,

Departments of <sup>3</sup>Pathology, <sup>4</sup>Internal Medicine, <sup>5</sup>Microbiology, and <sup>6</sup>Physiology

<sup>7</sup>Howard Hughes Medical Institute

University of Texas Southwestern Medical Center, Dallas, TX, USA

**One Sentence Summary:** *Becn1* role in phosphate,  $\alpha$ Klotho and lifespan

# **Current address:** Department of Nephrology, Yu-Huang-Ding Hospital, Qingdao University, Yantai, Shandong, People's Republic of China

\***Address correspondence to:**

Ming Chang Hu, M.D.; Ph.D.

Charles and Jane Pak Center for Mineral Metabolism and Clinical Research

The University of Texas Southwestern Medical Center

5323 Harry Hines Blvd., Dallas, TX 75390 USA

Email: [ming-chang.hu@utsouthwestern.edu](mailto:ming-chang.hu@utsouthwestern.edu)

Or

Orson W. Moe, M.D.

Charles and Jane Pak Center for Mineral Metabolism and Clinical Research

The University of Texas Southwestern Medical Center

5323 Harry Hines Blvd., Dallas, TX 75390 USA

Email: [orson.moe@utsouthwestern.edu](mailto:orson.moe@utsouthwestern.edu)

## Supplementary Information:

**Supplementary Figure 1. *Becn1*<sup>F121A</sup> upregulates autophagic flux in vivo.** *WT* (*Becn1*<sup>WT/WT</sup>;GFP-LC3) and *BK/BK* (*Becn1*<sup>FA/FA</sup>;GFP-LC3) mice at 12 weeks old were sacrificed 6 hours after chloroquine or vehicle (normal saline) treatment. There were 4 mice in each condition. (A) Representative microscopic images of GFP-LC3 immunofluorescence in the kidneys. Scale bar = 25  $\mu$ m. Right panel is the summary of quantitation of GFP-LC3 puncta in renal tubules. Data are presented as mean  $\pm$  S.D. for 4 mice per group. (B) Immunoblots of total kidney lysates for LC3 and p62 in the kidneys. Left panel is representative blot from 4 independent experiments. Right panel is summary and presented as mean  $\pm$  S.D. \*P<0.05, \*\*P<0.01 between two groups by one-way ANOVA followed by Student-Newman-Keuls *post hoc* test for A and B. (C) Left panel is representative co-immunoprecipitation (Co-IP) of beclin 1 and BCL2 in total kidney lysates of mice at baseline. Right panel is representative blots of input protein from 3 independent Co-IP experiments.

**Supplementary Figure 2. Characterize newly generated polyclonal rabbit anti-NaPi-2a and 2c antibodies.** (A) Immunoblots for NaPi-2a and NaPi-2c in brush border membrane vesicles (BBMVs) from mouse kidney cortex and HEK-293 cells transiently transfected with empty eGFP vector, human eGFP-NaPi-2a- or 2c plasmids respectively. Two days later, cells were harvested. One representative blot is shown from 3 independent experiments. (B) Immunoblots for NaPi-2a and NaPi-2c in total kidney lysates of NaPi-2a/2c double null or 2c null mice and *WT* littermates at 8 weeks old. The representative blot from 4 mice in each genotyping group, respectively.

**Supplementary Figure 3. *Becn1*<sup>F121A</sup> mice have lower apical membrane NaPi-2 transporters in the kidney than *WT* mice.** *WT* mice (*Becn1*<sup>WT/WT</sup>) and *BK/BK* (*Becn1*<sup>F121A/F121A</sup>) mice at 12 weeks old were sacrificed and kidney sections were stained NaPi-2a (A) and 2c (B). The representative microscopic images were from 3 independent experiments. Scale bar = 25  $\mu$ m. G: glomerulus.

**Supplementary Figure 4. *Becn1*<sup>F121A</sup> upregulates renal  $\alpha$ Klotho in growing *kl/kl* mice.**

Representative immunoblots of total kidney lysates for  $\alpha$ Klotho protein in the kidney of 4 genotypes (*kl/kl*, *WT*, *BK/BK;kl/kl*, and *BK/BK* mice) at the age of 8 weeks. Hematoxylin was stain for contrast stain. Each genotype has 4 mice.

**Supplementary Figure 5. *Becn1*<sup>FA</sup> upregulates renal  $\alpha$ Klotho expression in *kl/kl* mice at 12 weeks old in a manner of *Becn1*-dose dependence.** Representative immunoblots of total kidney lysates for  $\alpha$ Klotho protein in the kidney of 4 genotypes (*WT*, *BK/BK*, *BK/+;kl/kl*, and *BK/BK;kl/kl* mice) at the age of 12 weeks. Each genotype has 4 - 6 mice.

**Supplementary Figure 6. *Becl1F121A* restores reproductive organs in *kl/kl* mice.** (A) Comparison of female and male mouse body size among 4 genotypes (*kl/kl*, *WT*, *BK/BK;kl/kl*, and *BK/BK* mice) at 10 weeks old. Scale bar = 2 cm. (B) Comparison of female and male reproductive organs among 4 genotypes (*kl/kl*, *WT*, *BK/BK;kl/kl*, and *BK/BK* mice) at 10 weeks old. Scale bar = 0.3 cm. (C) Representative microscopic images of H&E stained gonad (Testis and ovary) sections of 4 genotypes (*kl/kl*, *WT*, *BK/BK;kl/kl*, and *BK/BK* mice). Scale bar = 100  $\mu$ m. There are mature spermatids (black arrow heads) in well-developed seminiferous tubules of male *WT*, *BK/BK;kl/kl*, and *BK/BK* mice, but not in *kl/kl* mice. There are mature follicles (black arrows) in female *WT*, *BK/BK;kl/kl*, and *BK/BK* mice, but not in *kl/kl* mice. Each genotype has 4 male and 4 female mice for A - C.

**Supplementary Figure 7. Trichrome stain in the kidney sections.** Representative scanned images of Trichrome stain in the kidney sections encompassing cortex and outer medulla (OM) zones from 4 genotypes (*kl/kl*, *WT*, *BK/BK;kl/kl*, and *BK/BK* mice) at 10 weeks old. There are numerous trichrome stained areas (black arrows) in *kl/kl* mice, and a few in *BK/BK;kl/kl* mice, but not in *WT* and *BK/BK* mice. High-magnified figures are presented in Figure 3E. Each type has 4 male and 4 female mice. Scale bar = 500  $\mu$ m.

**Supplementary Figure 8. High Pi diet downregulates renal  $\alpha$ Klotho mRNA expression.** *WT* mice at 10 weeks old were fed with normal (N Pi) or high Pi (H Pi) diet for 2 weeks and  $\alpha$ Klotho mRNA expression in the kidney was quantified with RT-qPCR. Data are presented as mean  $\pm$  S.D. from 6 mice per group. \*\* $P < 0.01$  between two groups by unpaired *t*-test.

**Supplementary Figure 9. High Pi induces cell injury *in vitro*.** OK cells were treated normal Pi (0.96 mM) media or high Pi (2.0 and 3.0 mM) media for 24 hours after cells were confluent. The media were harvested for measurement of lactate dehydrogenase (LDH), cell injury marker, with LDH cytotoxicity Assay Kit. The data is presented as mean  $\pm$  S.D. from 4 independent experiments. \* $P < 0.05$ , \*\* $P < 0.01$  between two groups by one-way ANOVA followed by Student-Newman-Keuls *post hoc* test.

## Supplementary Figures

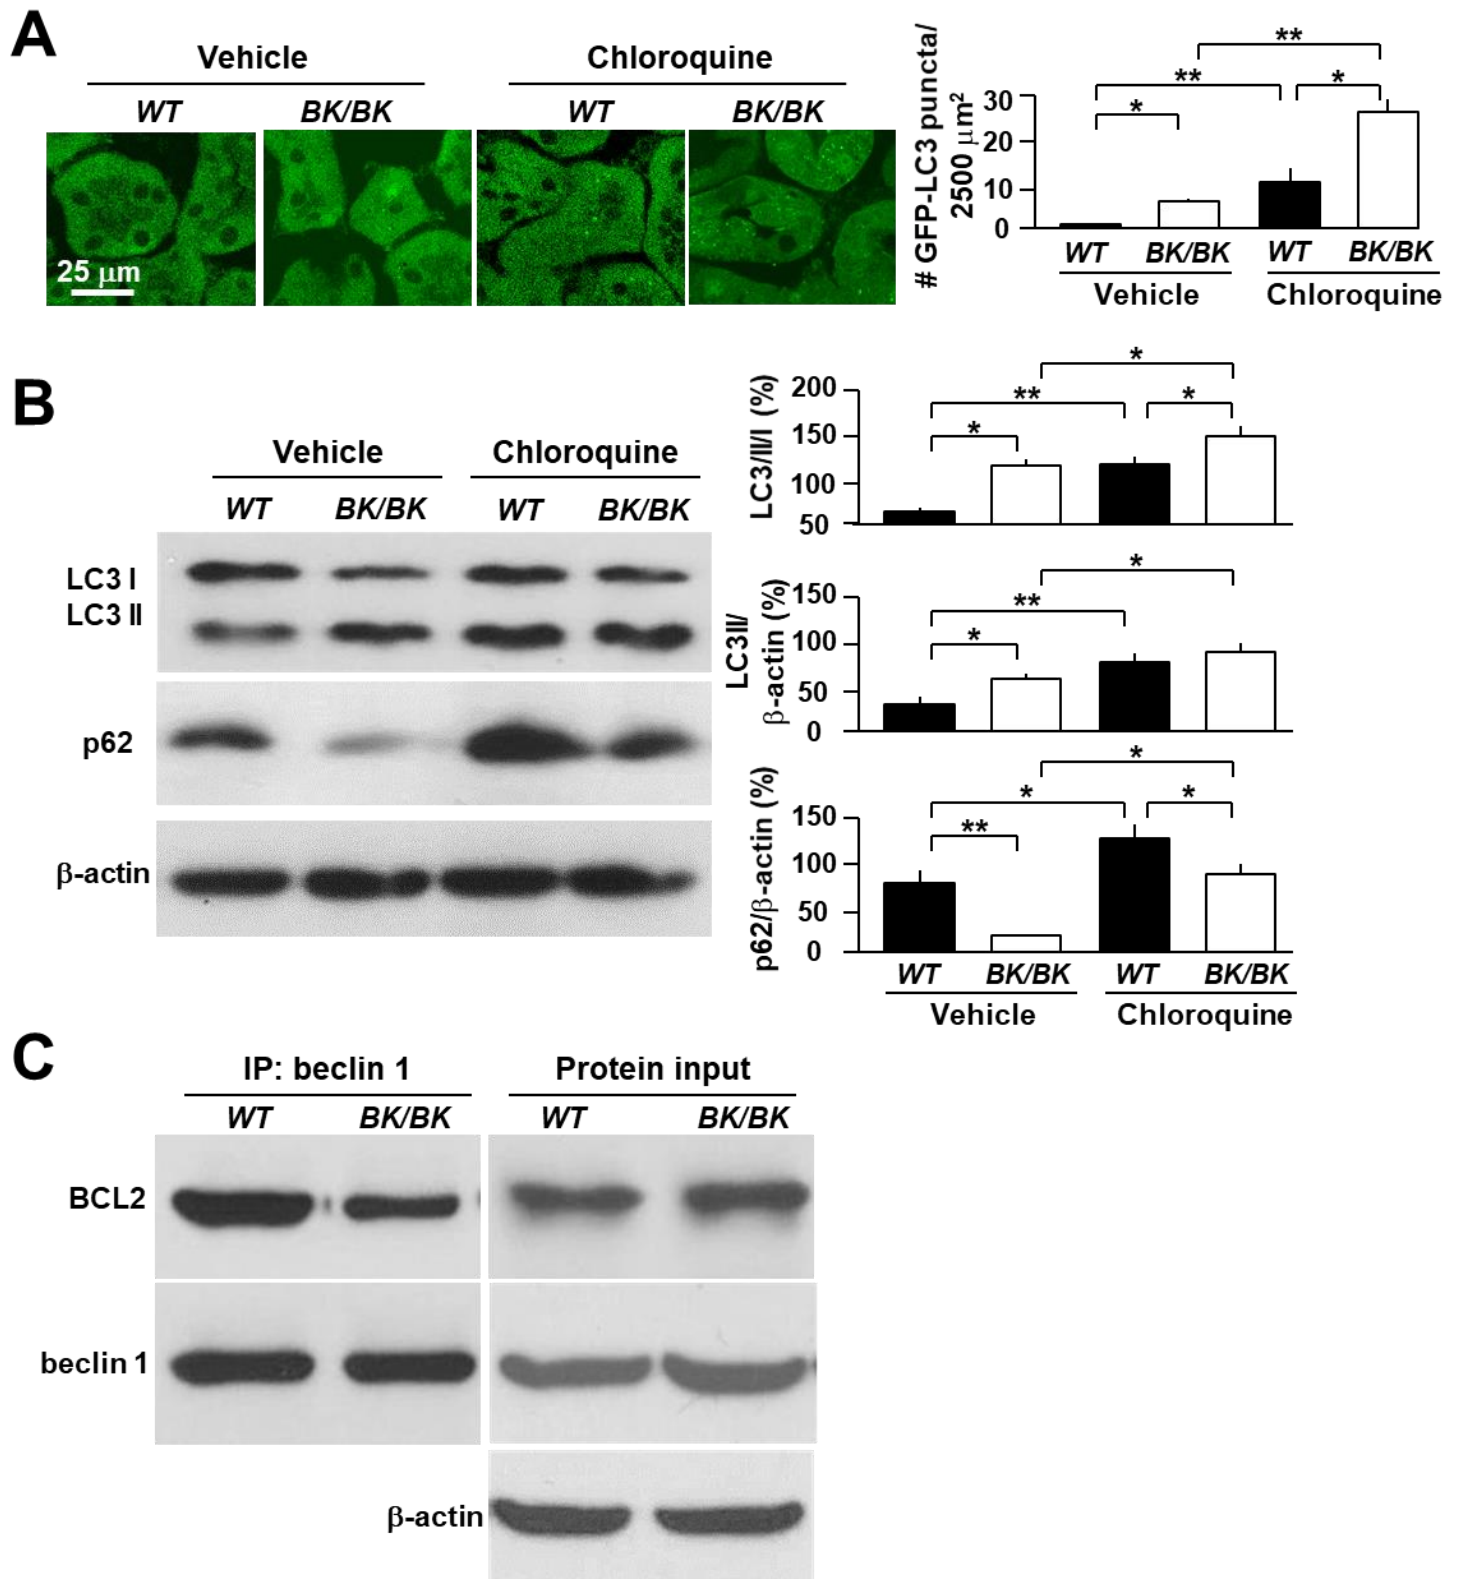

Supplementary Figure 1. Beclin1F121A upregulates autophagic flux in vivo.

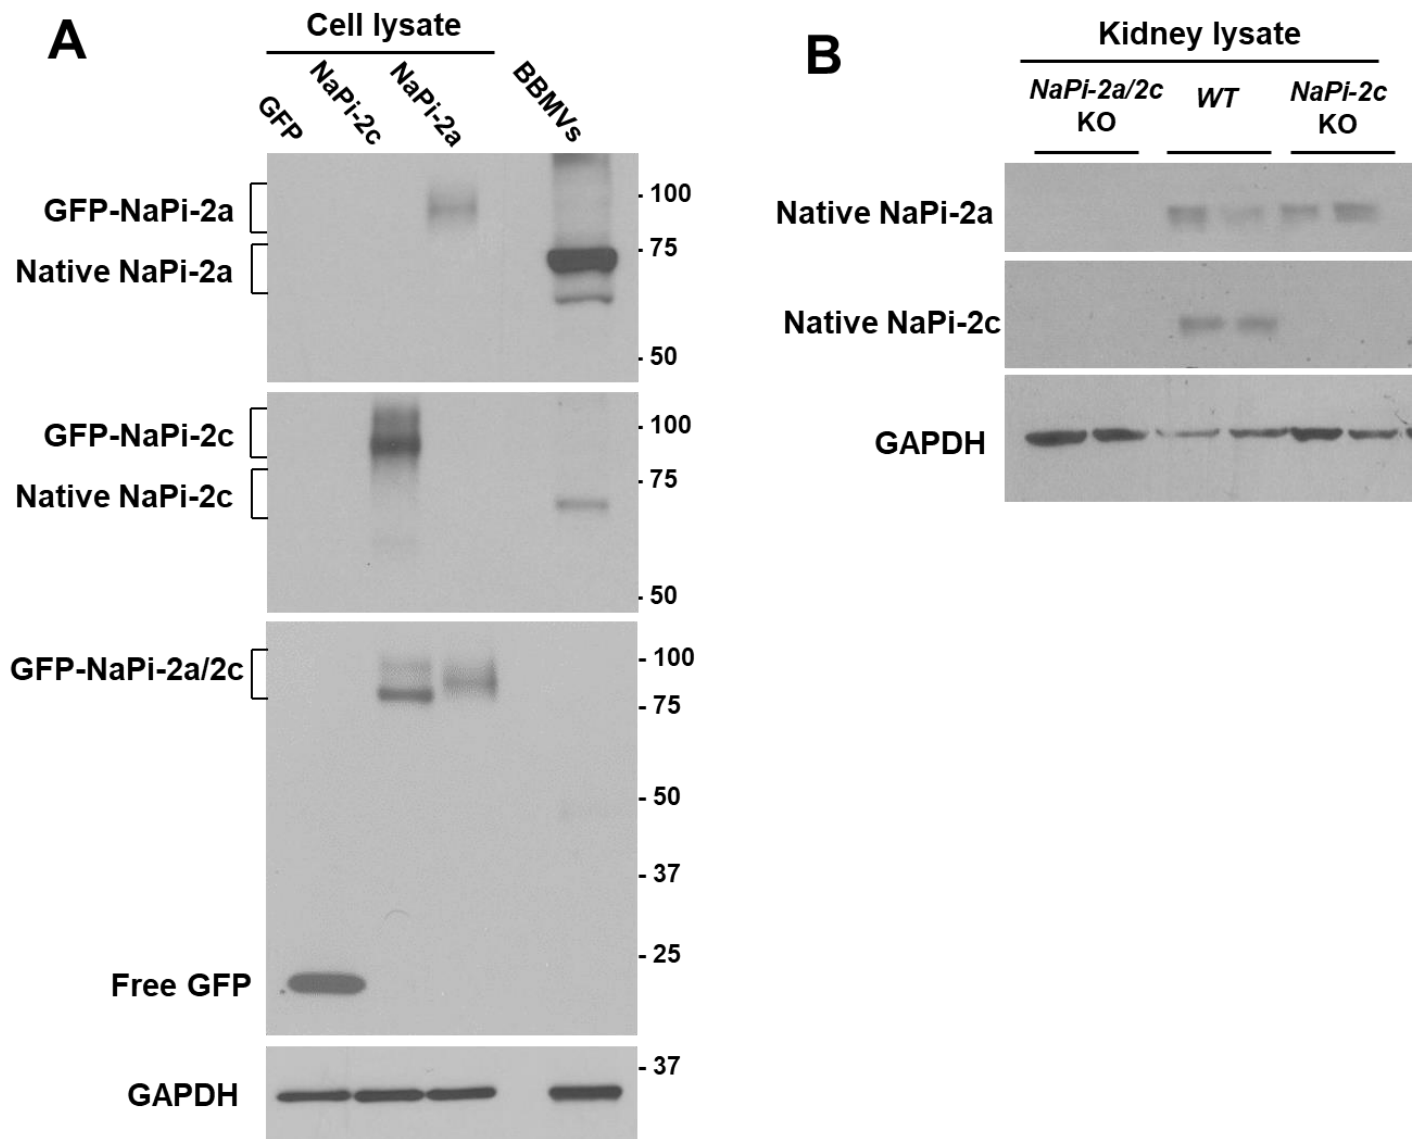

Supplementary Figure 2. Characterize newly generated polyclonal rabbit anti-NaPi-2a and 2c antibodies.

**A**

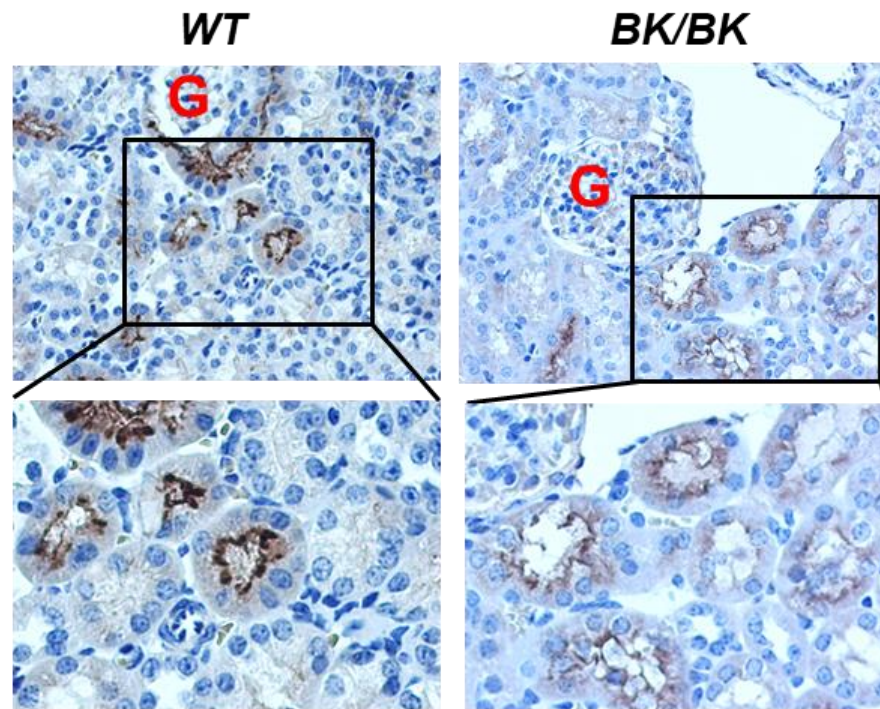

**B**

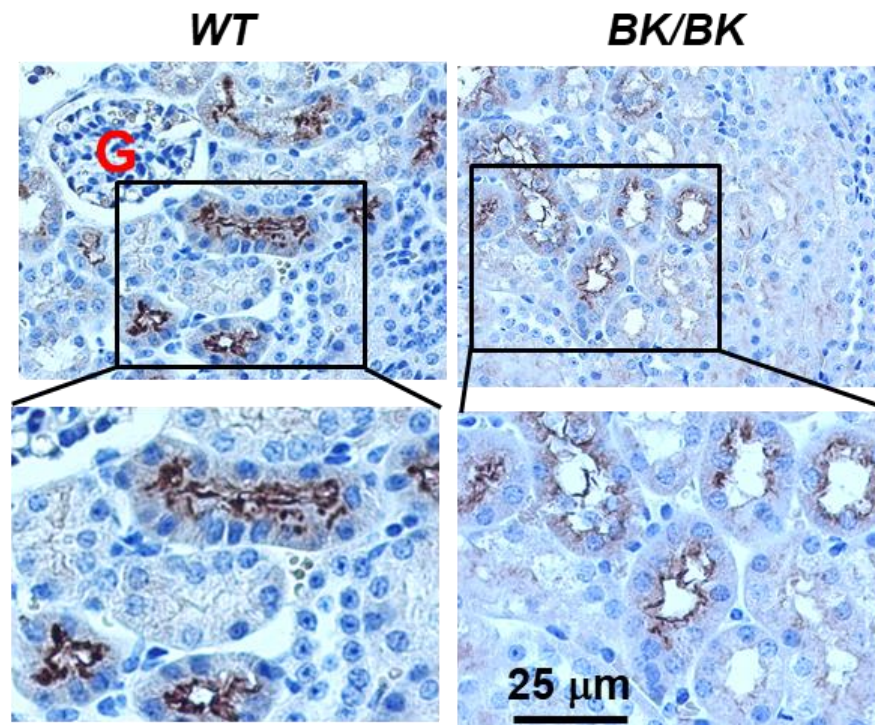

**Supplementary Figure 3. *Becn1*<sup>F121A</sup> mice have lower apical membrane NaPi-2 transporters in the kidney than *WT* mice.**

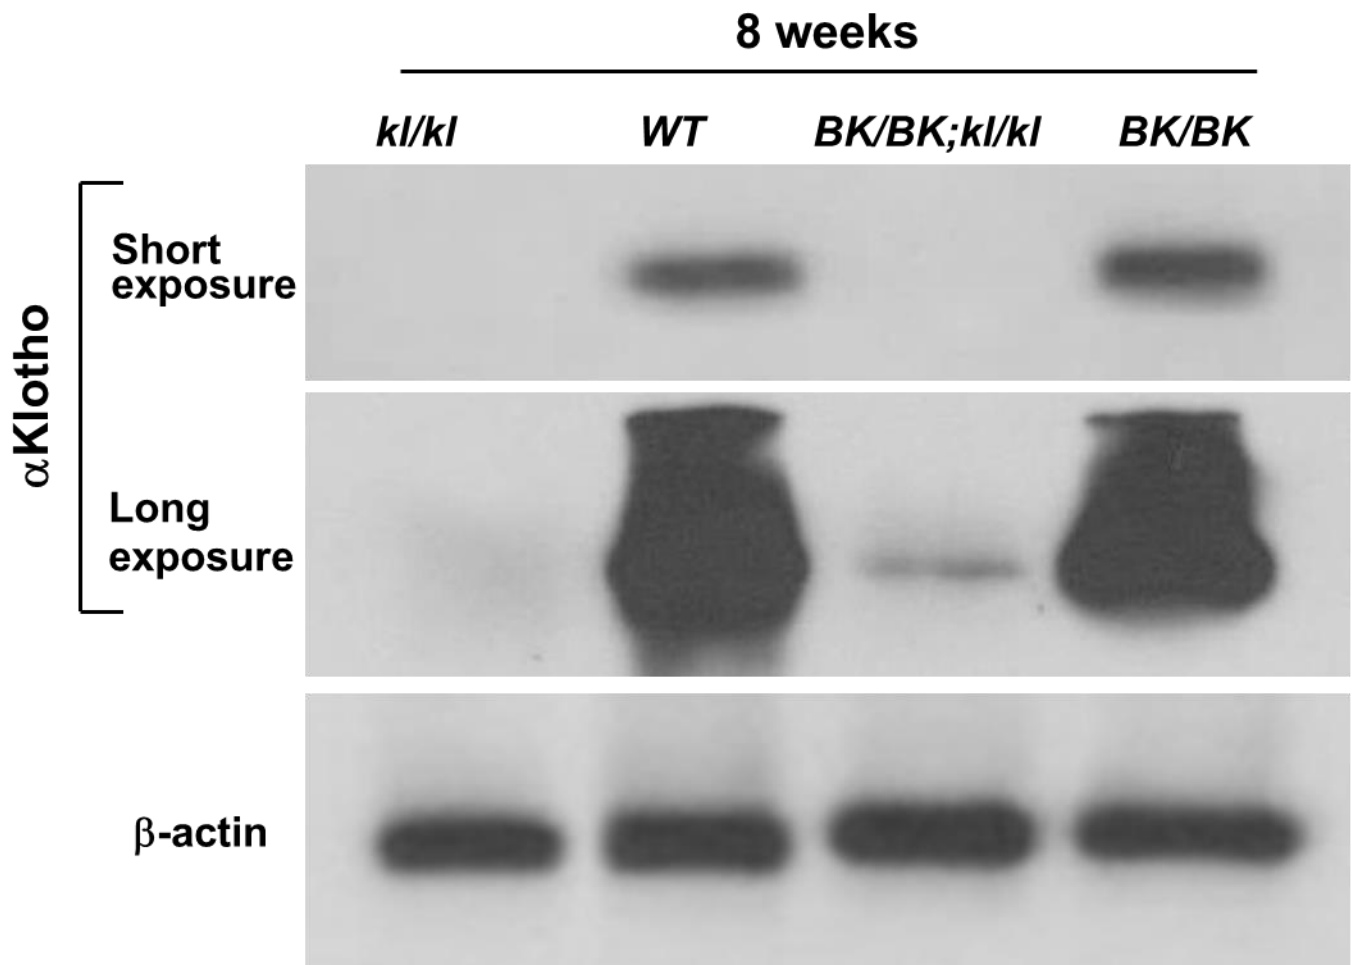

Supplementary Figure 4. *Becn1*F121A upregulates renal  $\alpha$ Klotho in growing *kl/kl* mice.

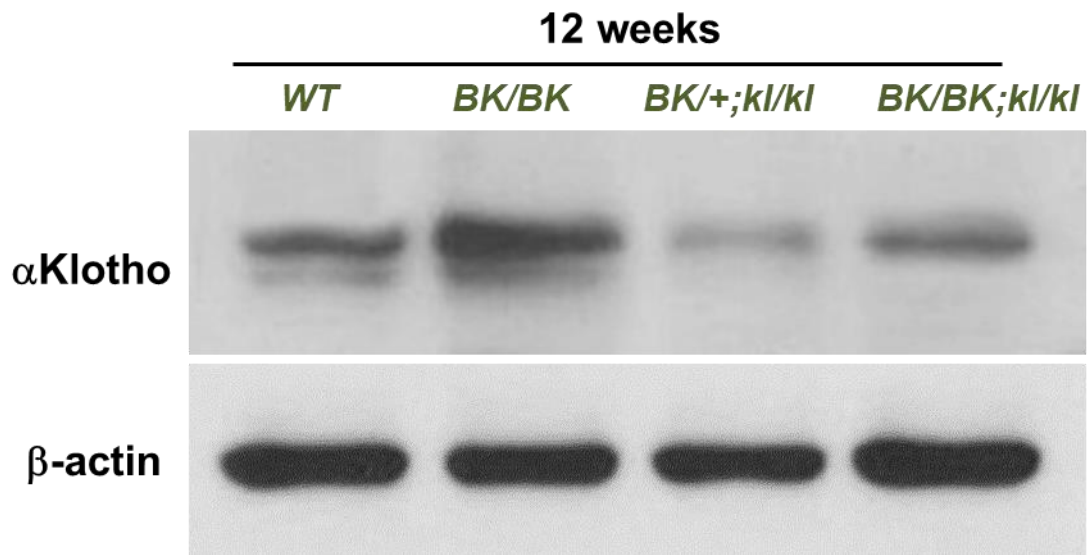

**Supplementary Figure 5. *Becn1*FA upregulates renal  $\alpha$ Klotho expression in *kl/kl* mice at 12 weeks old in a manner of *Becn1*-dose dependence.**



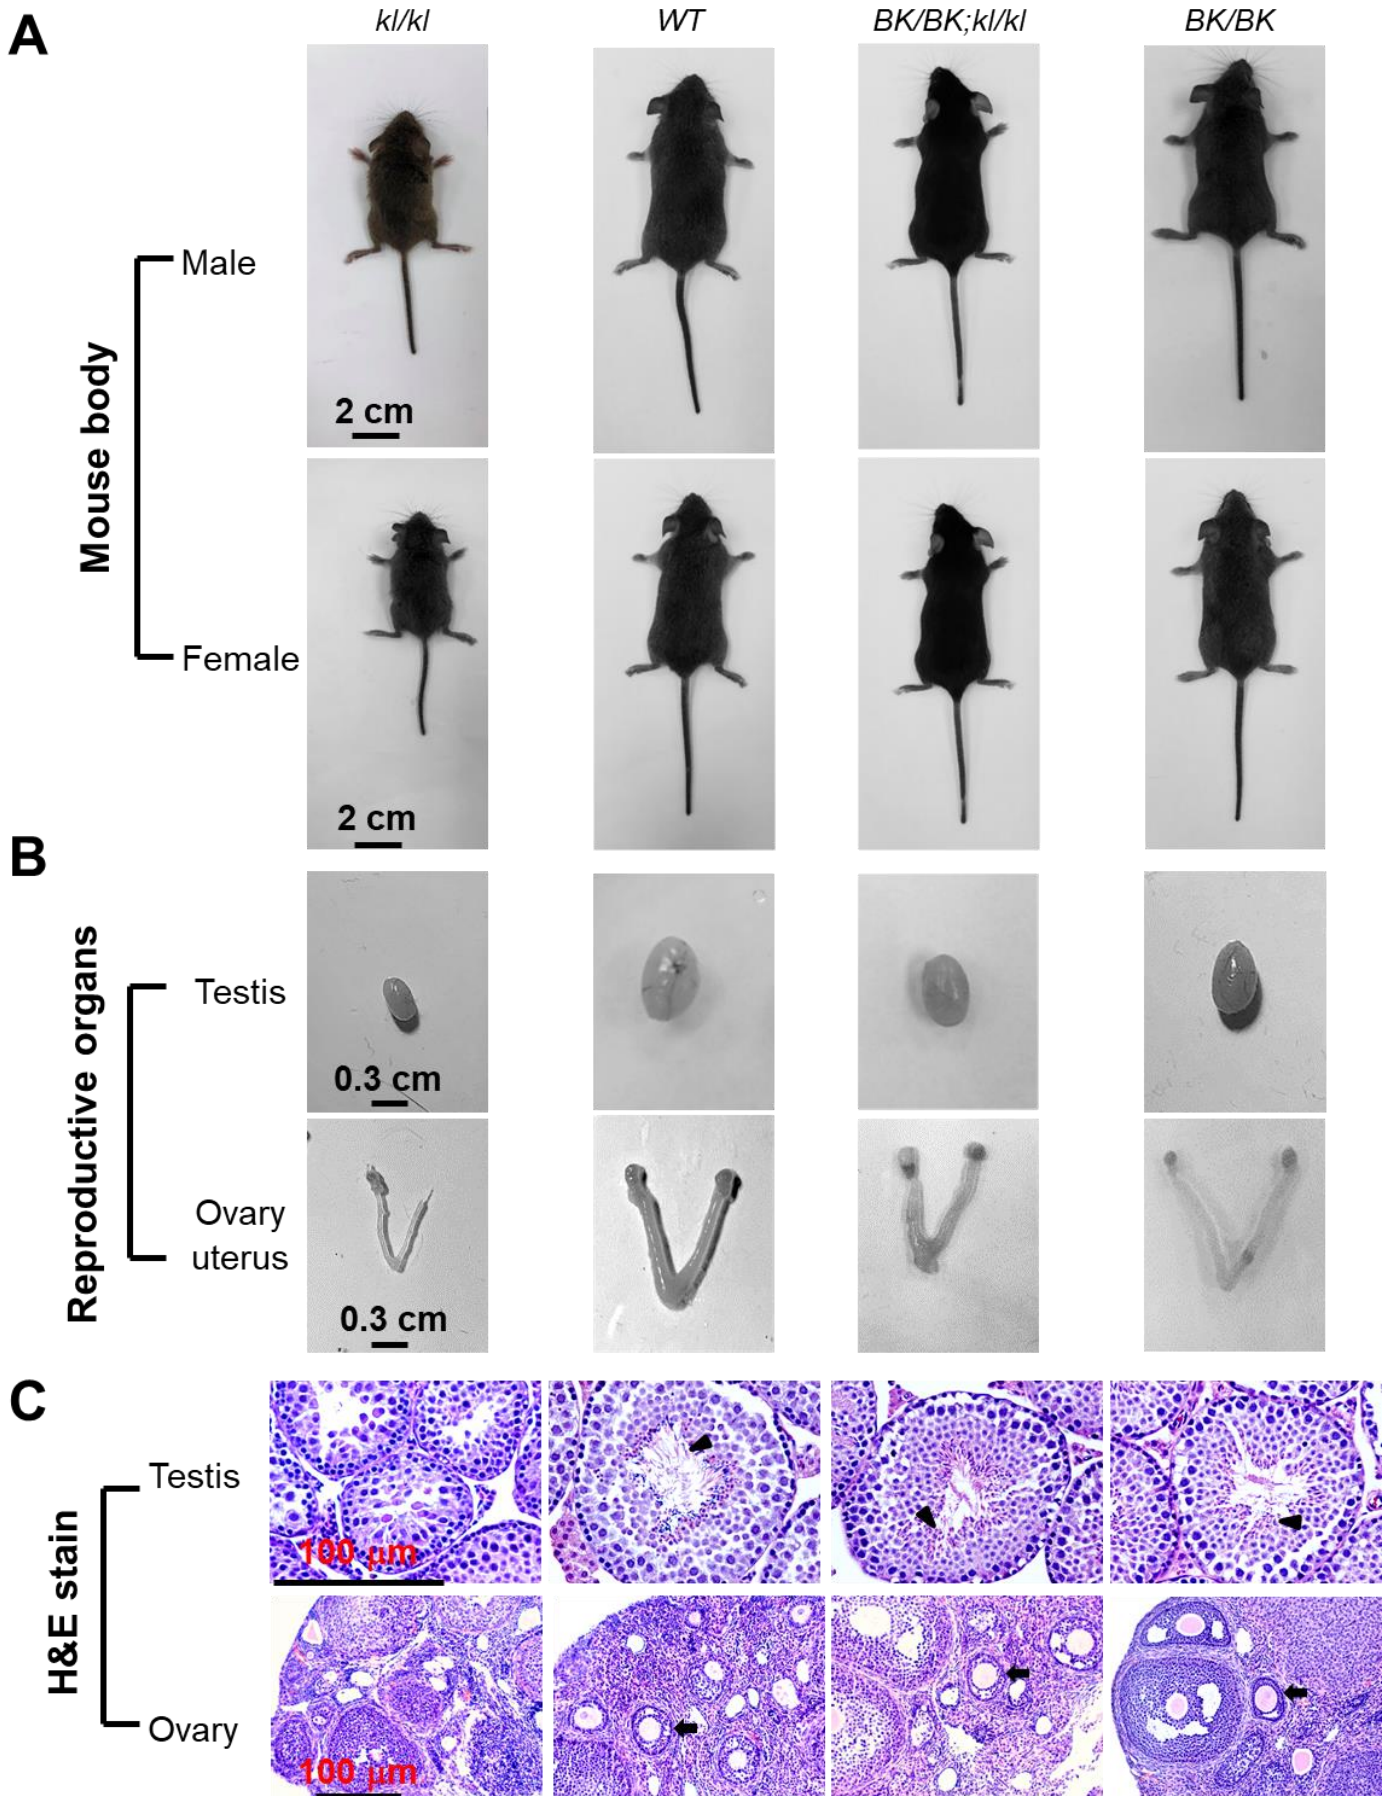

Supplementary Figure 6. *Becn1*F121A restores reproductive organs in *kl/kl* mice.

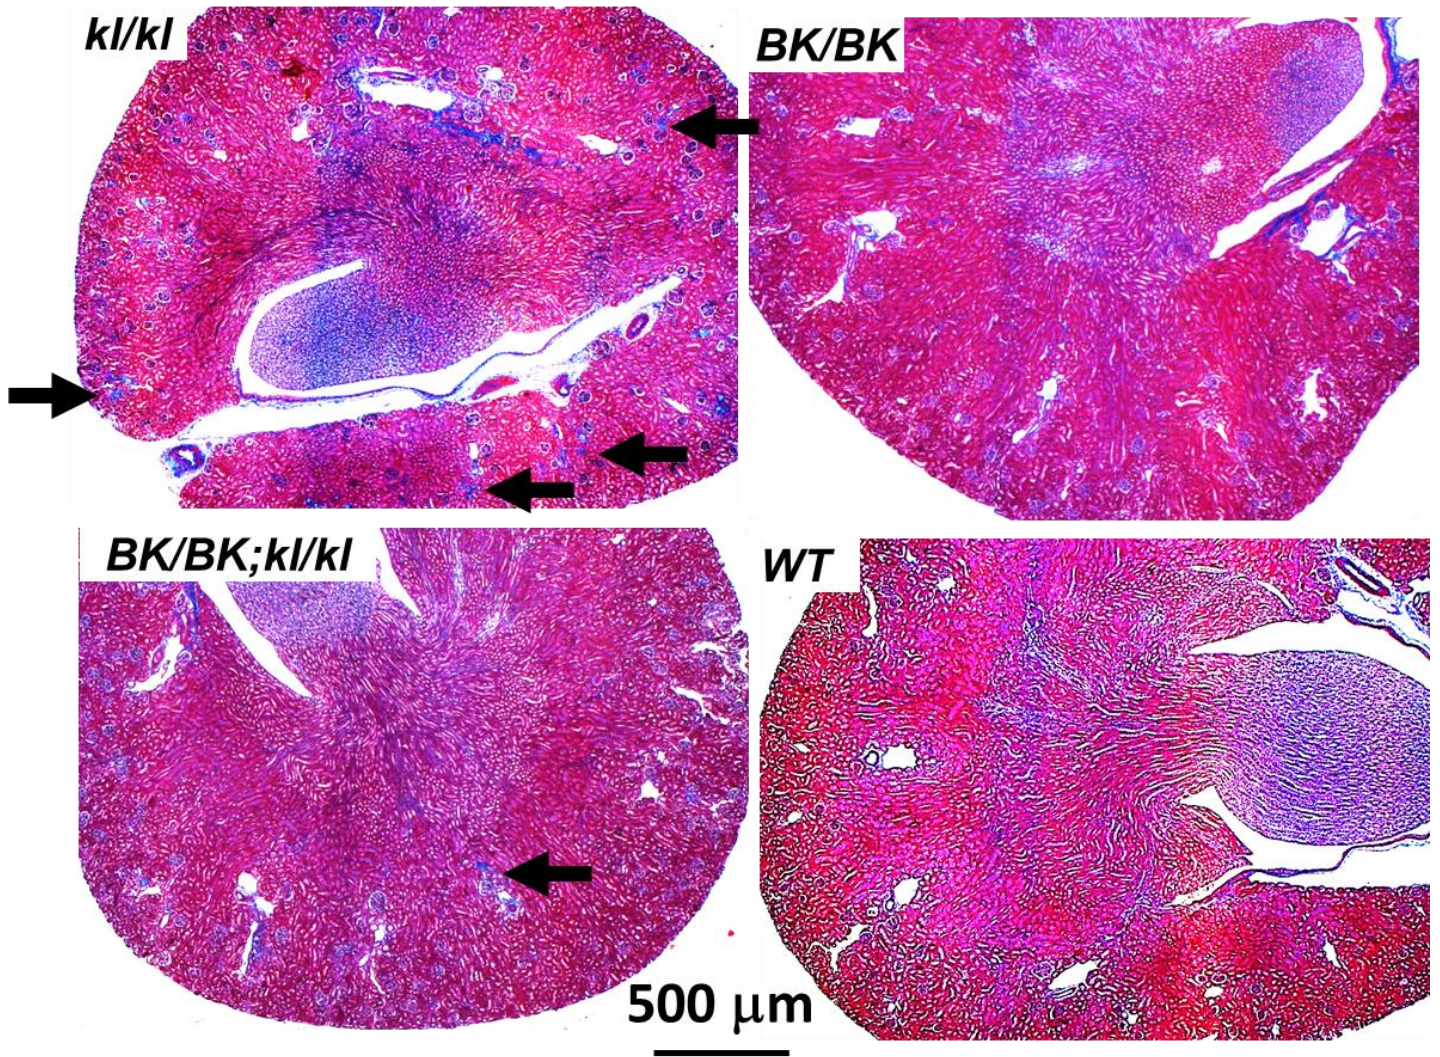

Supplementary Figure 7. Trichrome stain in the kidney sections.

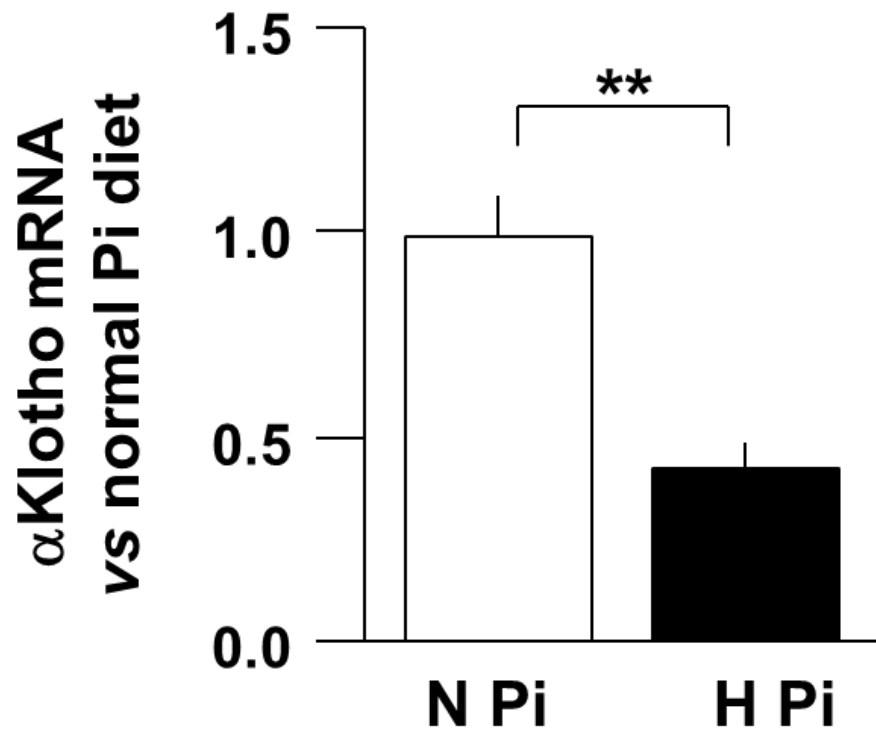

Supplementary Figure 8. High Pi diet downregulates renal  $\alpha$ Klotho mRNA expression.

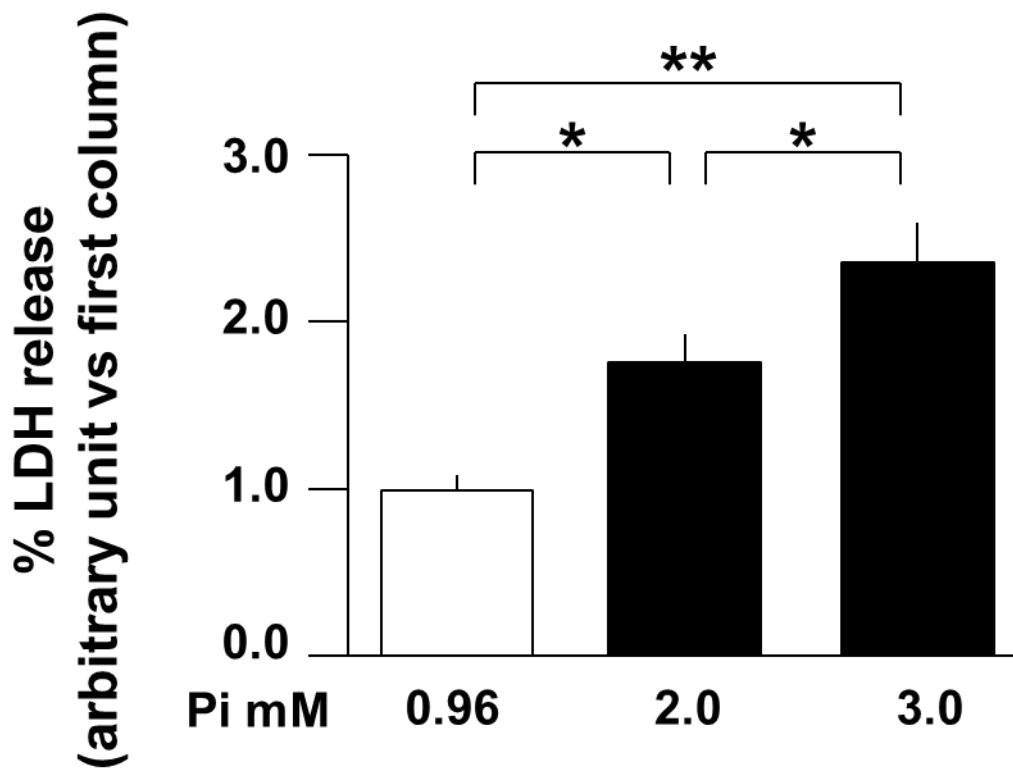

Supplementary Figure 9. High Pi induces cell injury *in vitro*.
